# Supplementary material for: A mechanism for S-adenosyl methionine assisted formation of a riboswitch conformation: a small molecule with a strong arm
Source: PubMed Central journal article supplement — Nucleic Acids Res. 2009 Aug 31;37(19):6528–39. doi: 10.1093/nar/gkp664 (PMC2770654; doi:10.1093/nar/gkp664), 2009-08-31
Supplement: gkp664_2.pdf [file gkp664_2.pdf]

SI Table 1 Hydrogen bonding monitor between SAM and the SAM-I riboswitch (SAM\_TRAJ)

| Donor          | Acceptor    | Occupancy (%) <sup>a</sup> | Distance(Å) |      | Angle(°) |       | Lifetime (ns) <sup>b</sup> |       | Maximum occupancy <sup>c</sup> |
|----------------|-------------|----------------------------|-------------|------|----------|-------|----------------------------|-------|--------------------------------|
|                |             |                            | Mean        | STD  | Mean     | STD   | Mean                       | STD   |                                |
| G11:N2         | SAM:OX<br>T | 99.99                      | 2.808       | 0.10 | 21.28    | 9.19  | 66.66                      | 75.45 | 17254                          |
| G58:N2         | SAM:OX<br>T | 99.88                      | 2.886       | 0.14 | 19.28    | 8.74  | 8.32                       | 9.27  | 4100                           |
| G11:N1         | SAM:O       | 99.69                      | 3.126       | 0.20 | 23.88    | 8.77  | 3.32                       | 5.15  | 2432                           |
| G11:N1         | SAM:OX<br>T | 98.87                      | 3.101       | 0.20 | 39.41    | 7.88  | 0.94                       | 1.91  | 1298                           |
| SAM:N(HT<br>2) | G58:N3      | 51.74                      | 2.997       | 0.14 | 20.89    | 11.98 | 0.35                       | 0.89  | 704                            |
| SAM:N(HT<br>1) | G58:N3      | 33.79                      | 2.99        | 0.16 | 20.23    | 11.38 | 0.26                       | 0.76  | 715                            |
| SAM:N          | G58:N3      | 12.2                       | 3.013       | 0.16 | 23.19    | 12.44 | 0.16                       | 0.54  | 551                            |
| SAM:N(HT<br>3) | G58:O2'     | 11.77                      | 2.904       | 0.15 | 45.33    | 12.05 | 0.02                       | 0.02  | 26                             |
| SAM:N(HT<br>2) | G58:O2'     | 11.52                      | 2.906       | 0.15 | 44       | 12.49 | 0.02                       | 0.03  | 54                             |
| SAM:N(HT<br>1) | G58:O2'     | 5.29                       | 2.875       | 0.14 | 42.63    | 12.43 | 0.02                       | 0.03  | 19                             |
| A45:O2'        | SAM:N1      | 1.2                        | 3.139       | 0.28 | 29.54    | 14.86 | 0.03                       | 0.05  | 37                             |
| SAM:N6         | A45:N3      | 1                          | 3.175       | 0.25 | 45.27    | 10.29 | 0.02                       | 0.03  | 23                             |

- Occupancy indicates the percentage of the time that this hydrogen bond is formed.
- The average time that this hydrogen bond is formed.
- The maximum number of consecutive frames (10 ps/frame) that this hydrogen bond is formed in the trajectory.
